# Supplementary material for: Characterization of Metabolite Profile in Phyllanthus niruri and Correlation with Bioactivity Elucidated by Nuclear Magnetic Resonance Based Metabolomics
Source: PubMed Central journal article supplement (PMC6152626; doi:10.3390/molecules22060902), 2017-05-30
Supplement: molecules-22-00902-s001.pdf [file molecules-22-00902-s001.pdf]

Supplemental Material

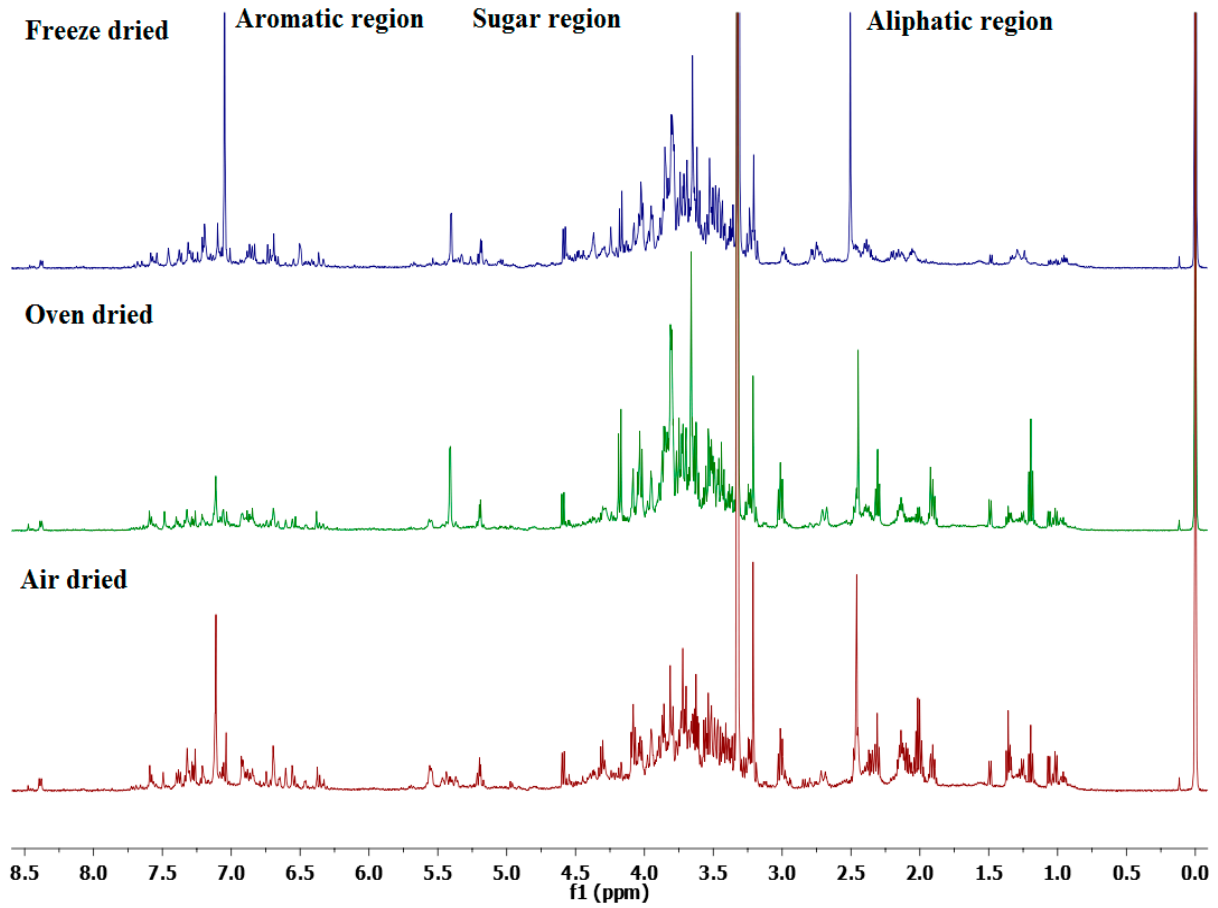

Figure S1. Overlay <sup>1</sup>H NMR spectra of the three dried *P. niruri* extracts

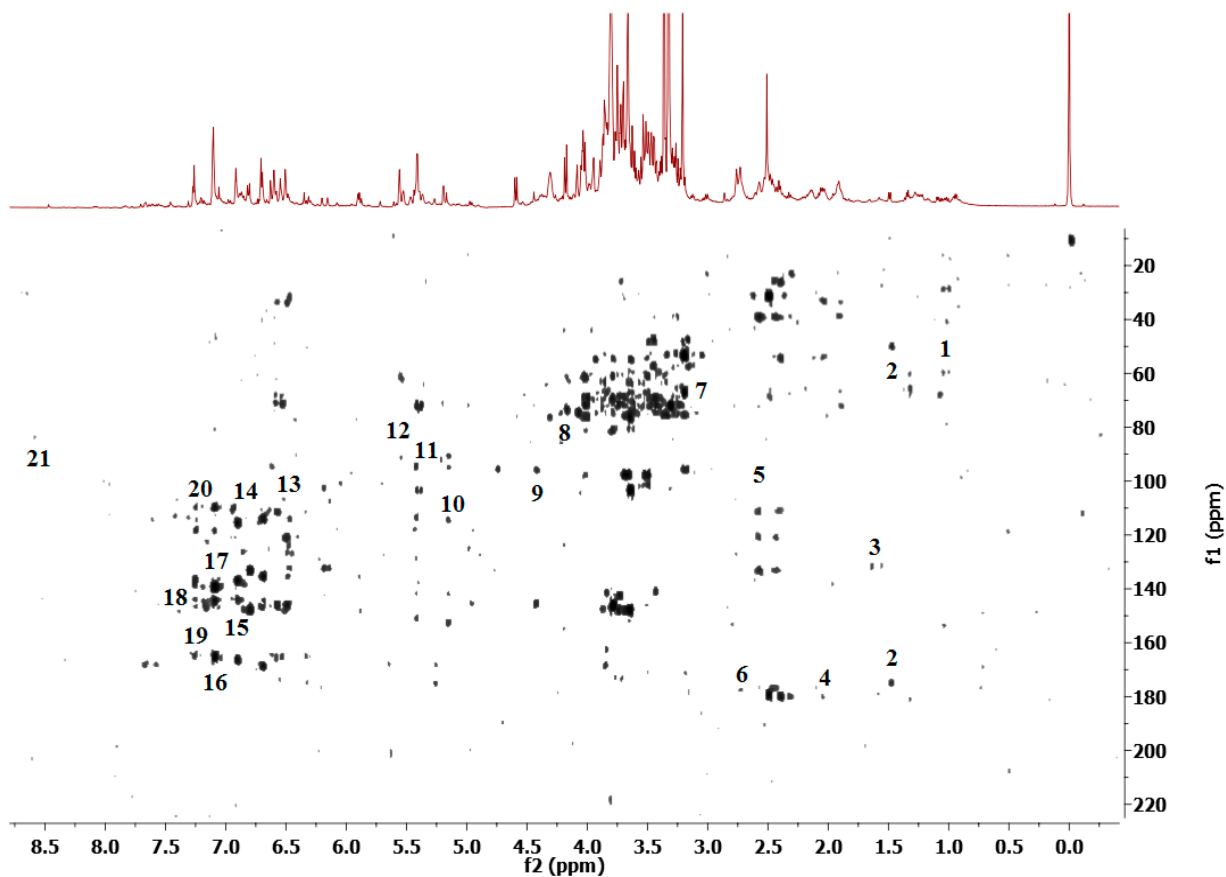

**Figure S2.** Representative HMBC spectra of *P. niruri* extract

Assignments: 1, Leucine; 2, alanine; 3, valine; 4, acetic acid; 5, catechin; 6, malic acid; 7, choline; 8, fructose; 9,  $\beta$ -glucose; 10,  $\alpha$ -glucose; 11, sucrose; 12, hypophyllanthin; 13, rutin; leucine; 14, phyllanthin; 15, epicatechin; 16, caffeic acid; 17, quercetin derivatives; 18, ellagic acid; 19, gallic acid; 20, chlorogenic acid; and 21, formic acid

DPPH

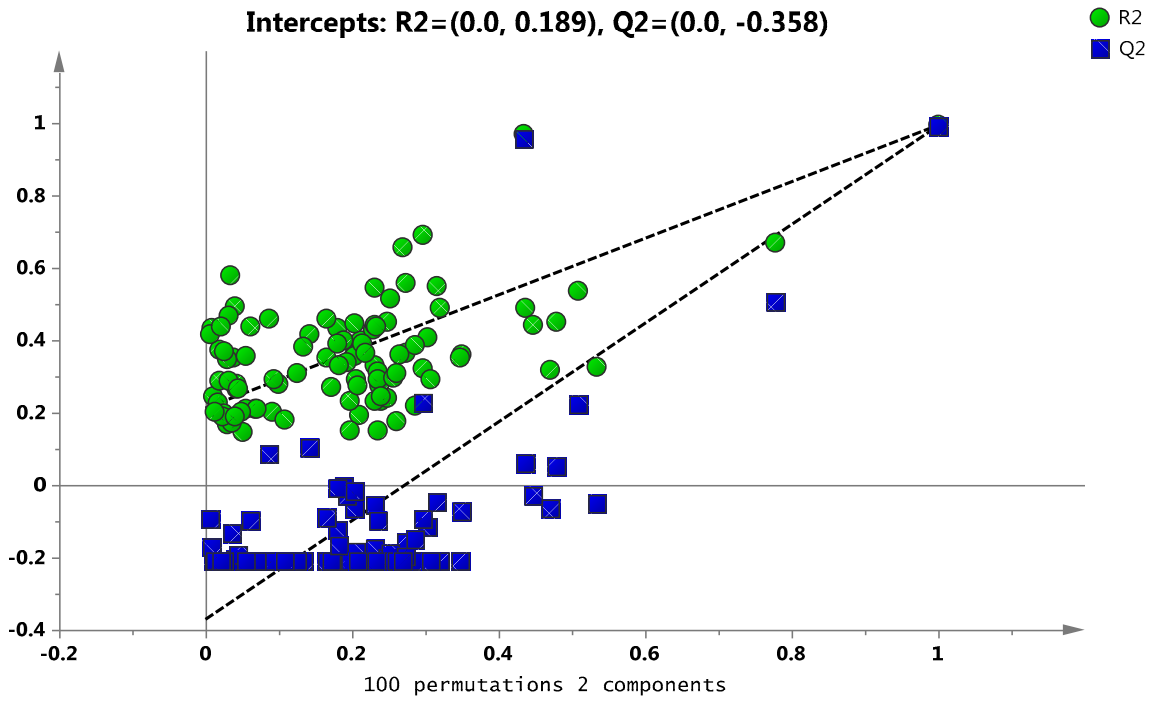

FRAP

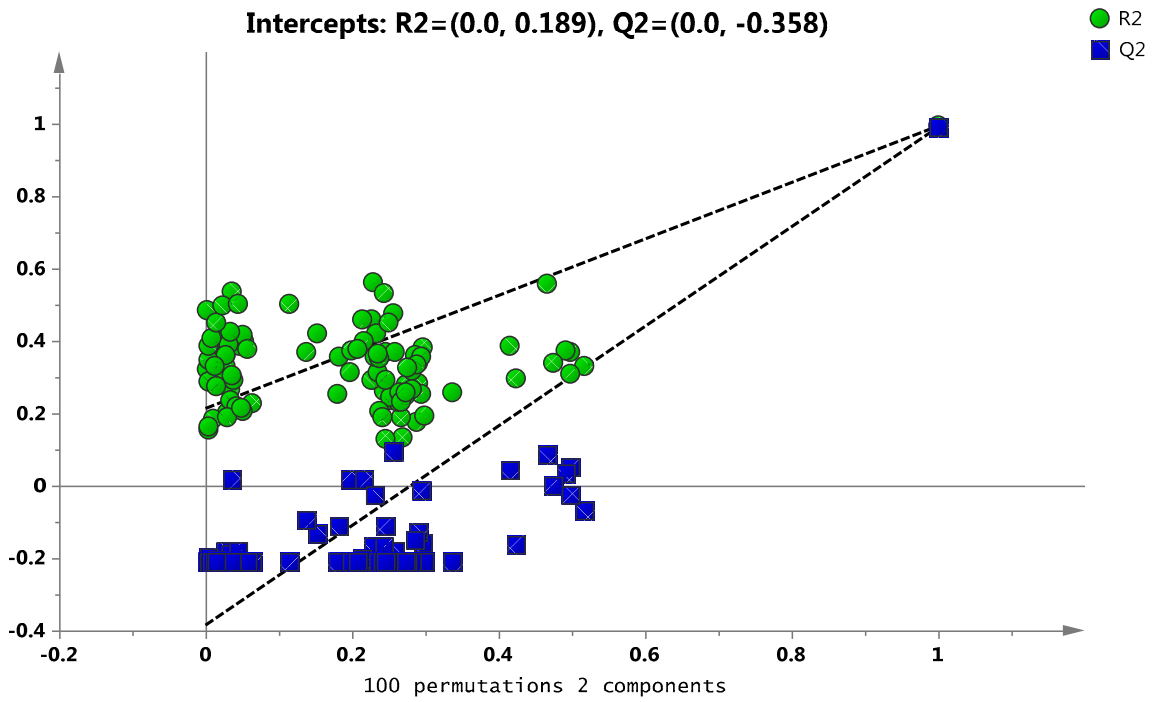

Alpha glucosidase

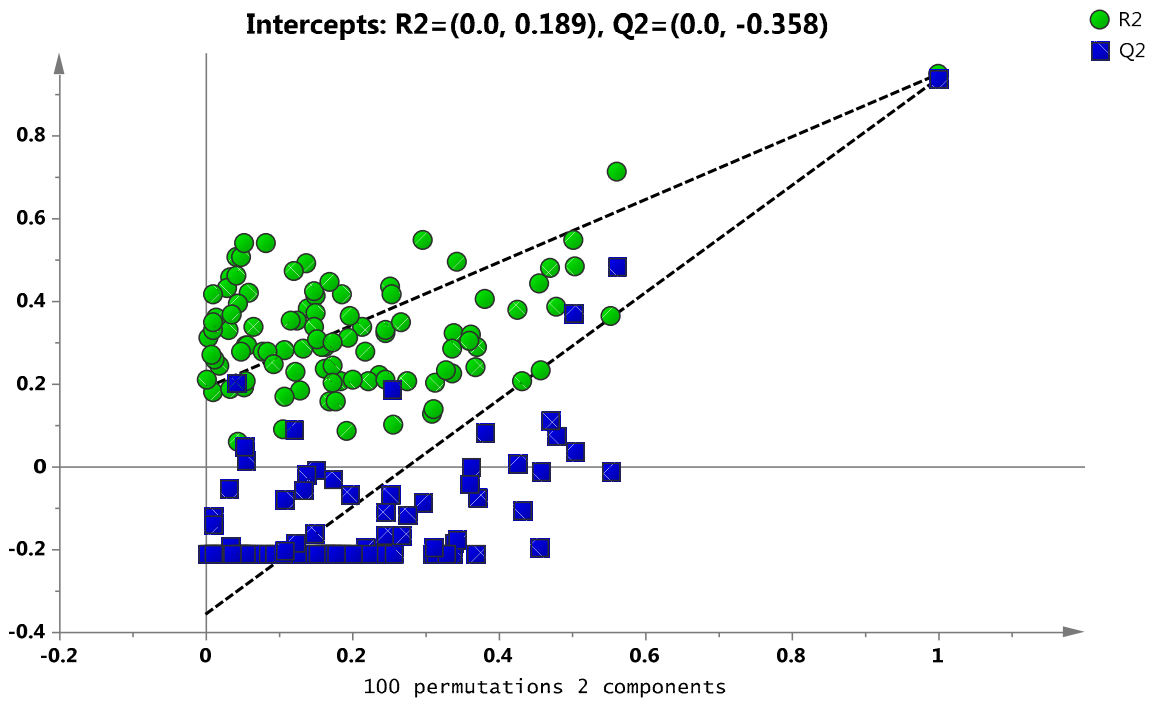

Figure S3. The permutations for validation of partial least square (PLS) model

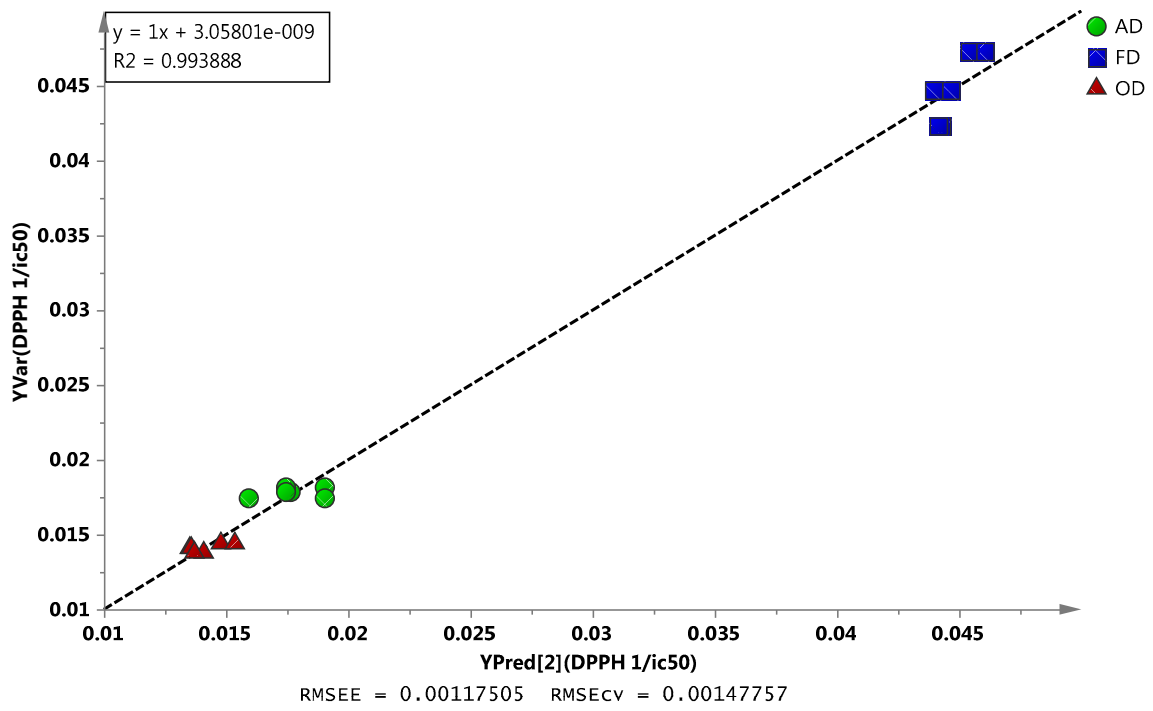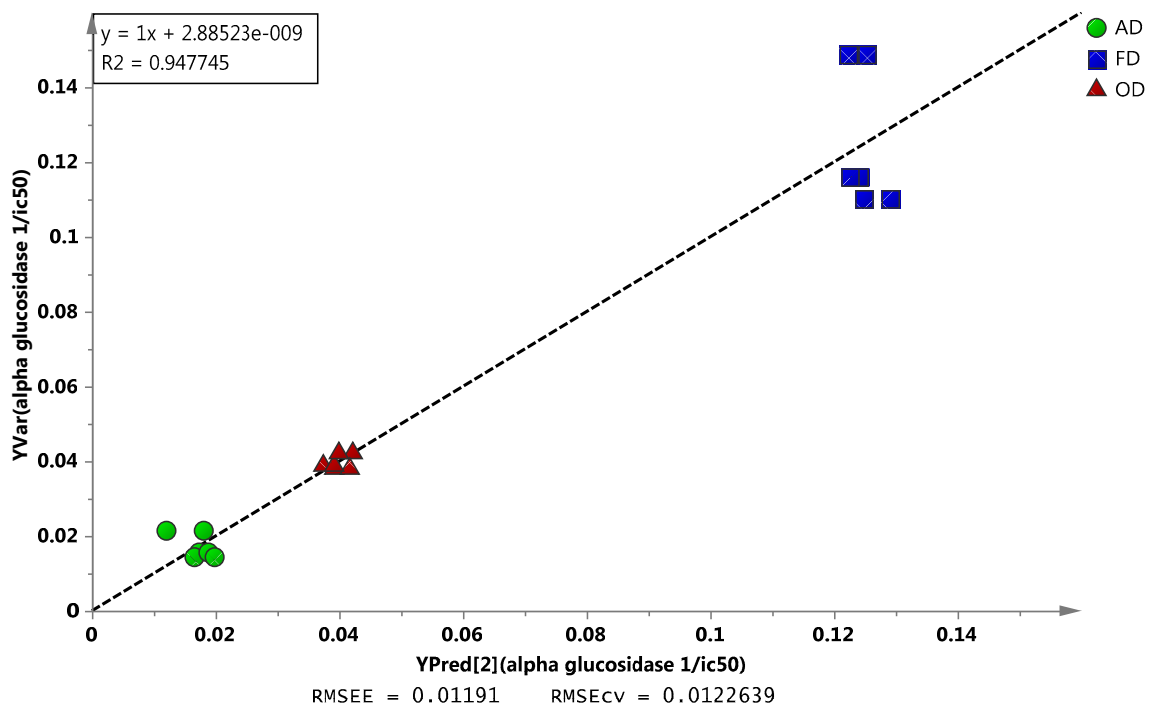

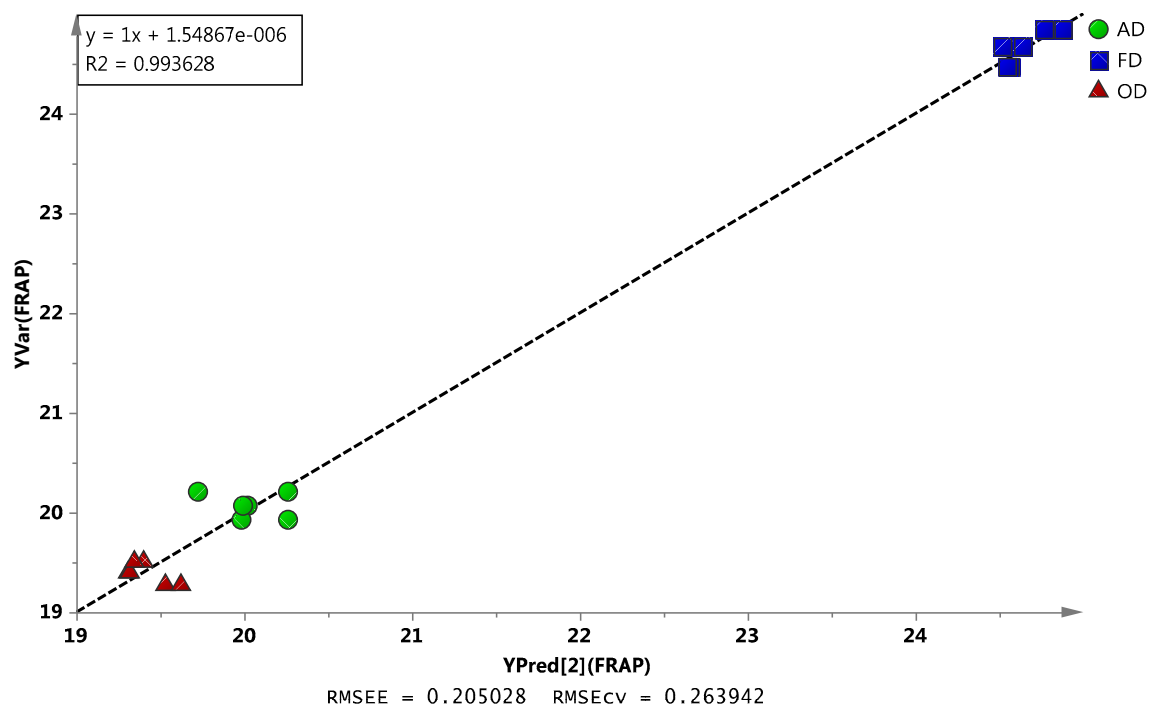

AD – Air drying; OD – Oven drying; FD – Freeze drying

Figure S4. Observed versus predicted plots of partial least square (PLS) model
